# Supplementary material for: Synthesis, Structural Investigations, and In Vitro/In Silico Bioactivities of Flavonoid Substituted Biguanide: A Novel Schiff Base and Its Diorganotin (IV) Complexes
Source: MDPI journal article supplement (doi:10.3390/molecules27248874), 2022-12-14
Supplement: s1 [file s1]

L  
1H\_8scan DMSO {D:\Spectra} nmr 34

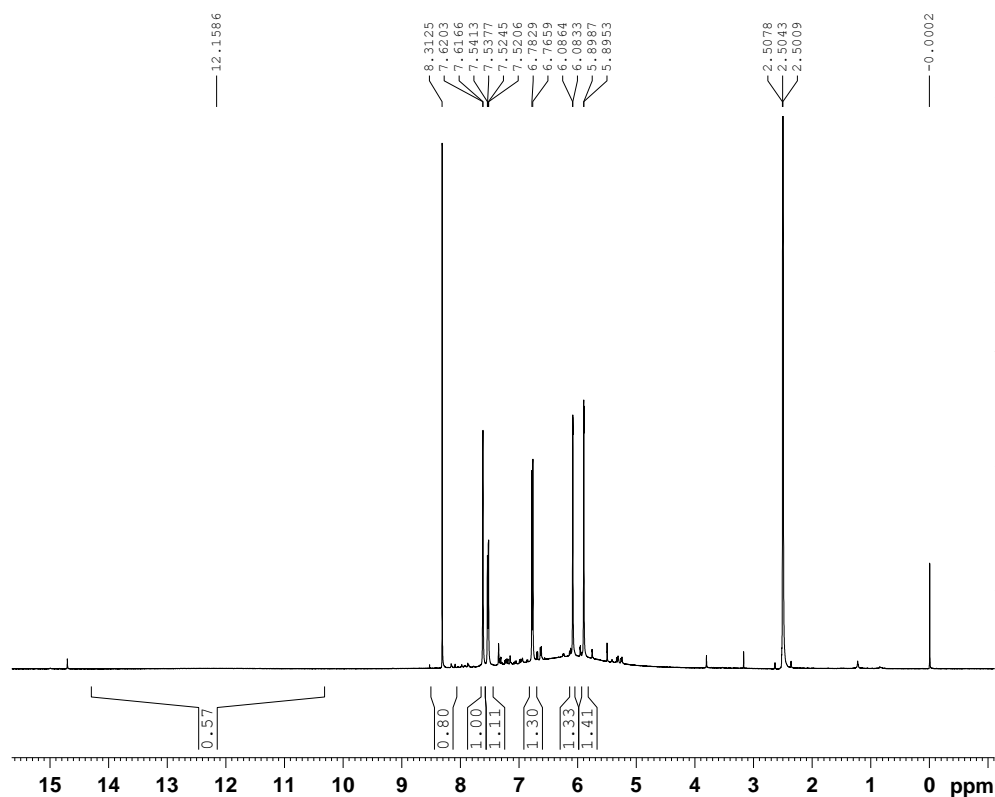

BRUKER  
AVANCE NEO  
500 MHz NMR  
SPECTROMETER  
SAIF, P.U.

Current Data Parameters  
NAME Mar12-2021  
EXPNO 340  
PROCNO 1

F2 - Acquisition Parameters  
Date\_ 20210313  
Time\_ 14.22 h  
INSTRUM Avance Neo 500  
PROBHD Z119470\_0333 (zg30)  
PULPROG 65536  
TD 8  
SOLVENT DMSO  
NS 0  
DS 0  
SWH 14705.883 Hz  
FIDRES 0.448788 Hz  
AQ 2.2282240 sec  
RG 95.7854  
DW 34.000 usec  
DE 6.79 usec  
TE 300.2 K  
D1 1.00000000 sec  
TD0 1  
SFO1 500.1730885 MHz  
NUC1 1H  
P0 3.33 usec  
P1 10.00 usec  
PLW1 20.93000031 W

F2 - Processing parameters  
SI 65536  
SF 500.1700019 MHz  
WDW EM  
SSB 0  
LB 0.30 Hz  
GB 0  
PC 1.00

Figure S1:  $^1\text{H}$  NMR Spectra of  $\text{H}_2\text{L}$ .

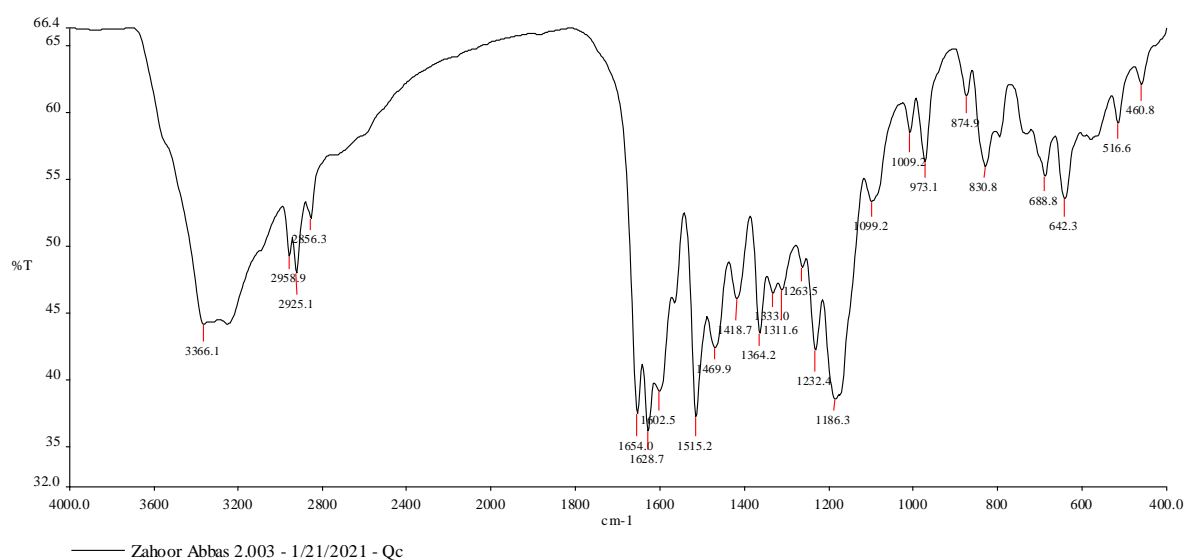

Figure S2: IR Spectra of H<sub>2</sub>L.

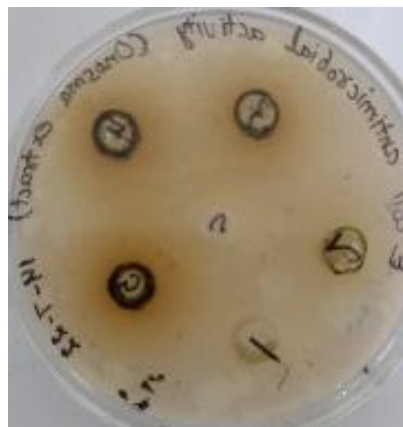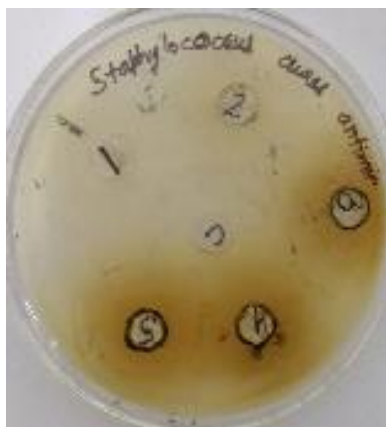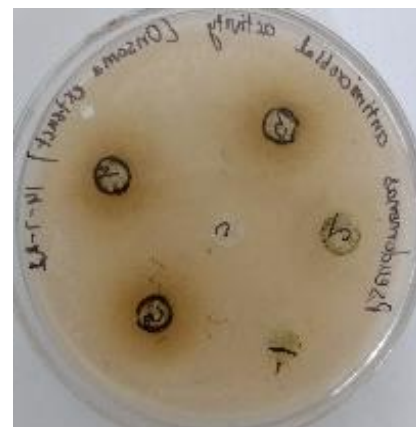

Figure S3: anti-bacterial activities of quercetin complexes.

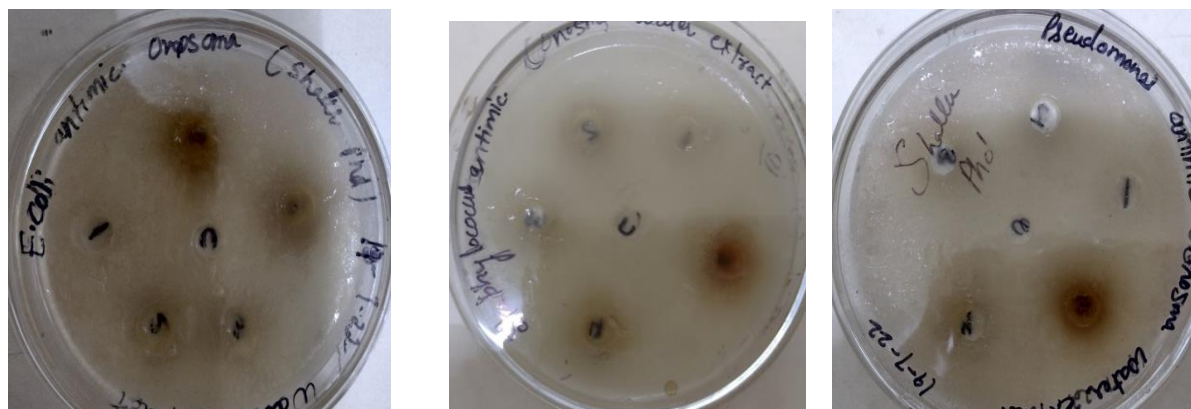

Figure S4: anti-bacterial activities of quercetin ligand (Schiff base).
